# Supplementary material for: Reverse voltage pulse deposition of a porous polyaniline/Mn–Co sulfide composite cathode material for modified Zn-ion hybrid supercapacitors
Source: Royal Society of Chemistry journal article supplement (doi:10.1039/d3nj01962d), 2023-01-01
Supplement: d3nj01962d1.pdf [file d3nj01962d1.pdf]

## SUPPORTING INFORMATION

### Reverse Voltage Pulse Deposition of Porous Polyaniline/Mn-Co Sulfide Composite Cathode Material for Modified Zn-ion Hybrid Supercapacitor

Duong V. Thiet<sup>a</sup>, Doan T. Tung<sup>b,c,\*</sup>, Le T. T. Tam<sup>b,c</sup>, Ngo T. Dung<sup>b</sup>, Le T. Tam<sup>d</sup>, Pham T. Nam<sup>b</sup>, Nguyen T. T. Trang<sup>b</sup>, Dimitra Vernardou<sup>e</sup>, Top K. Le<sup>f,g</sup>, Nguyen V. Tam<sup>h</sup>, Tran D. Lam<sup>b,c</sup> and Le T. Lu<sup>b,c,\*</sup>

*a. Faculty of Mechanical Engineering, Hanoi University of Industry, Tu Liem District, Hanoi, Vietnam*

*b. Institute for Tropical Technology-Vietnam Academy of Science and Technology (VAST), 18 Hoang Quoc Viet, Hanoi, Vietnam.*

*c. Graduate University of Science and Technology-VAST, 18 Hoang Quoc Viet, Hanoi, Vietnam.*

*d. Vinh University, 182 Le Duan, Vinh City, Nghe An, Province 43000, Vietnam.*

*e. Department of Electrical and Computer Engineering, School of Engineering, Hellenic Mediterranean University, 71410 Heraklion, Greece.*

*f. Faculty of Materials Science and Technology, University of Science, Ho Chi Minh City 700000, Vietnam.*

*g. Vietnam National University, Ho Chi Minh City 700000, Vietnam.*

*h. Defect Control Group, Samsung Display Vietnam Co., Ltd, Yen Phong Industrial Zone, Yen Trung, Yen Phong, Bac Ninh, Vietnam.*

## Supplementary Figures

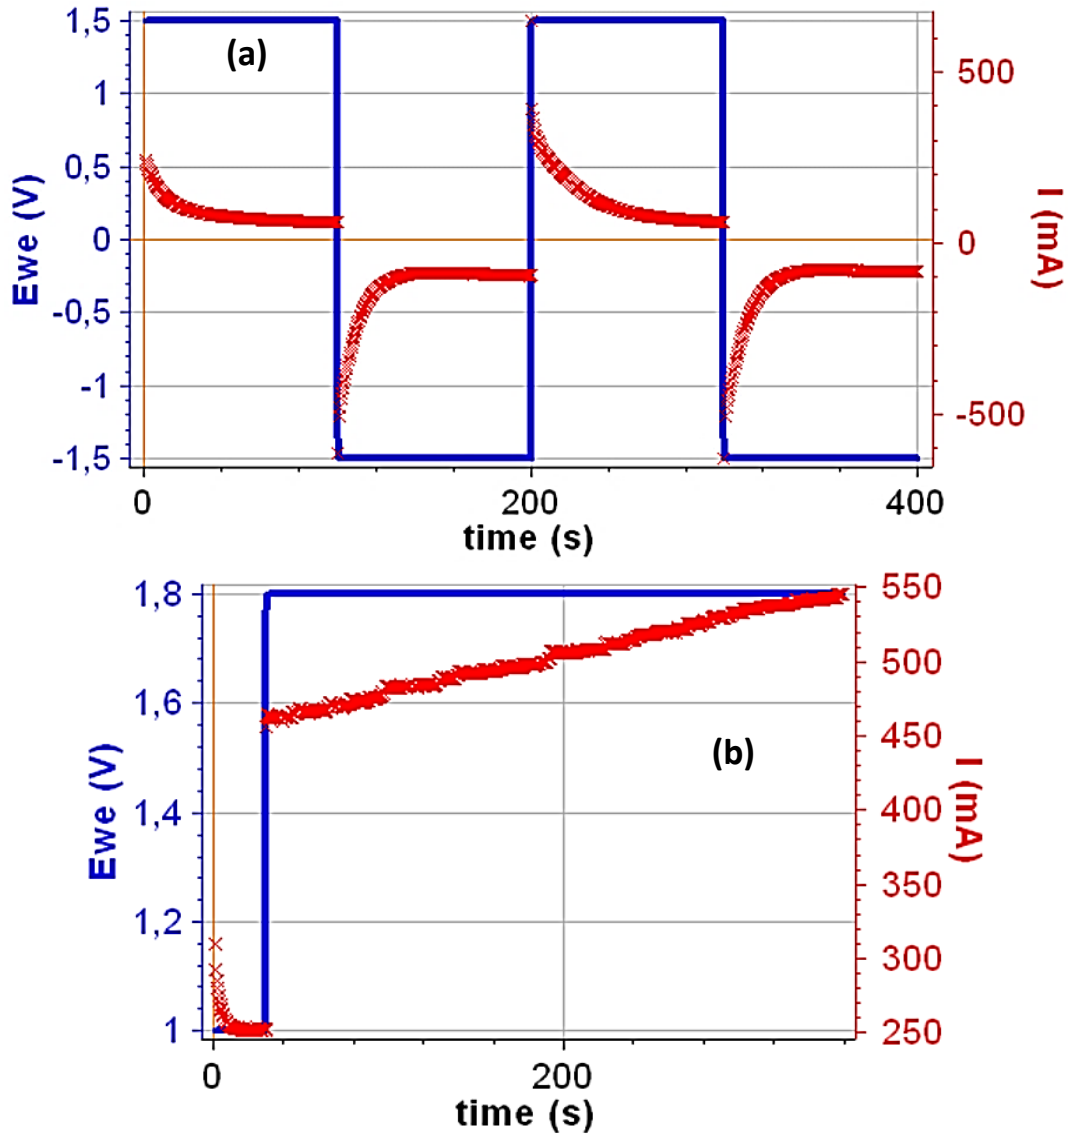

**Fig. S1.** Potential and current graphs of electrodeposition method (a) and electroplating method (b).

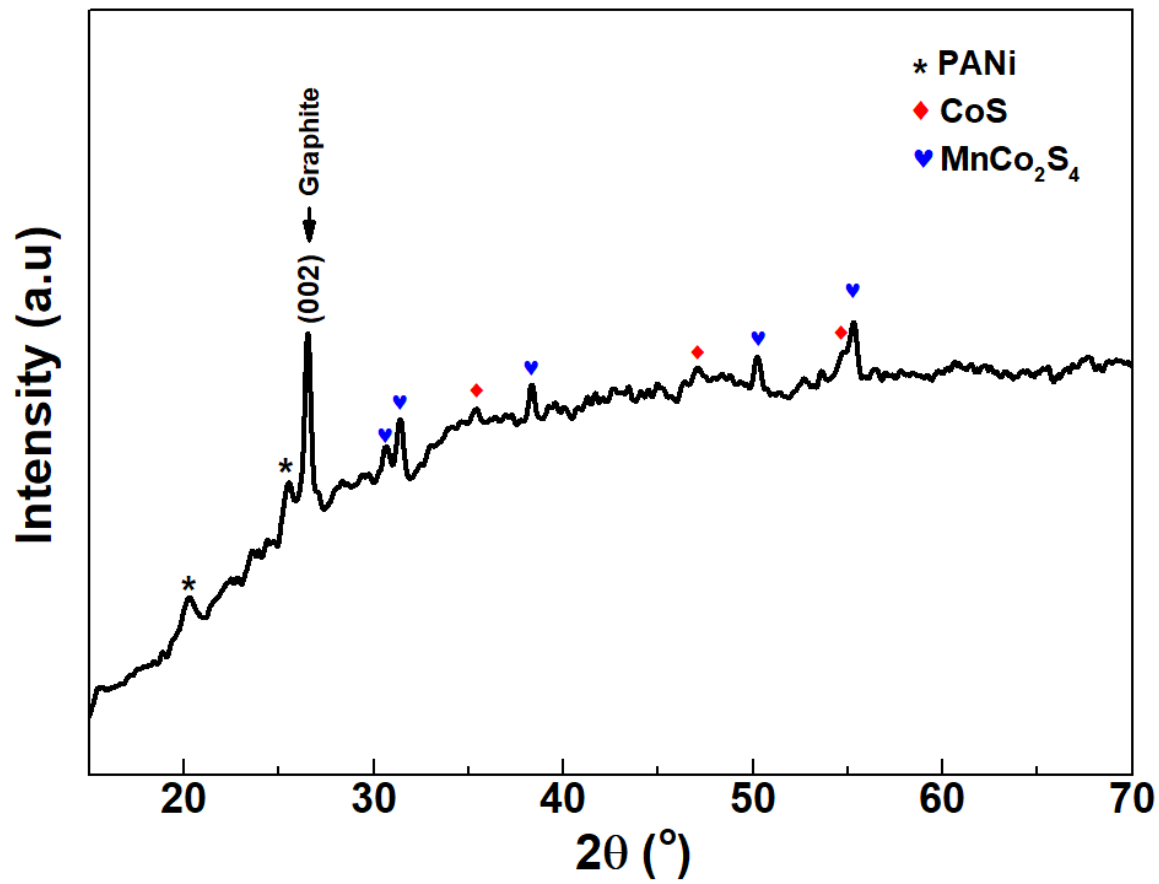

**Fig. S2.** XRD pattern of MCS/PANI electrode.

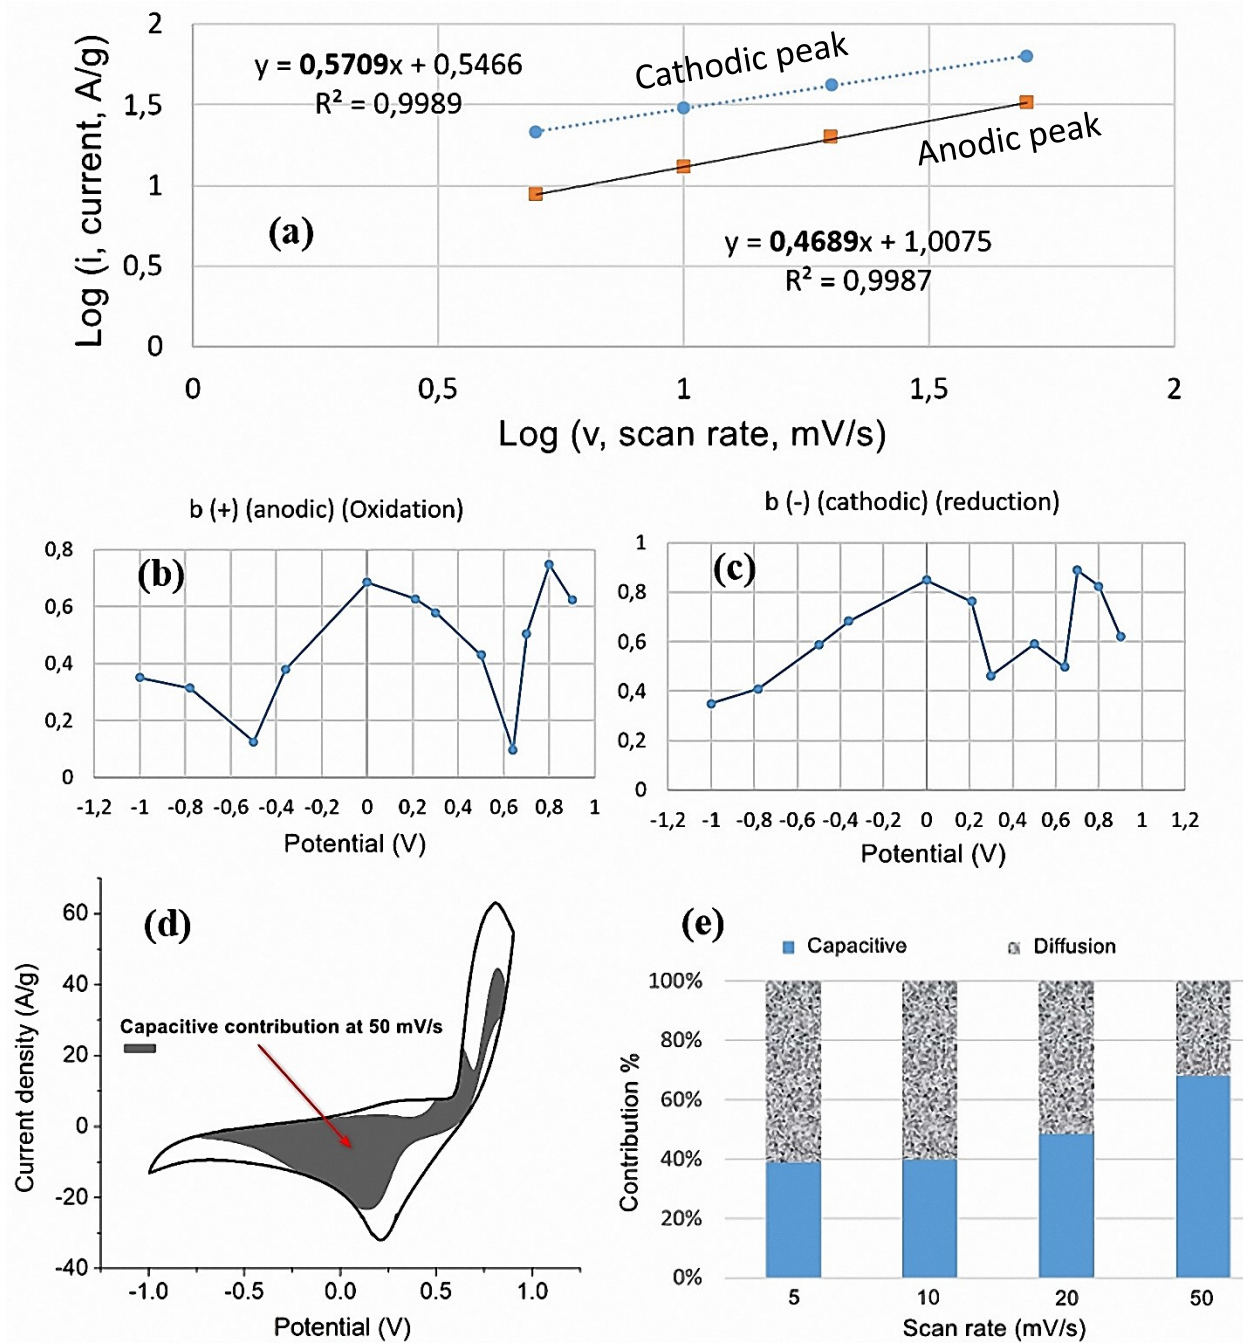

**Fig. S3.** Log I (A/g) vs log v (mV/s) (a), b factor vs some potential value (b,c), CV curve with capacitive contribution at scan rate of 50 mV/s (d) and the percentages of capacitive and diffusion contributions at different scan rates (e).

## Supplementary Tables

**Table S1.** Electrochemical performance and synthesis methods of different transition metal sulfides-based electrodes

| Materials                                        | Method                                           | Electrolyte                                          | Working Potential (V) | Specific capacitance                                 | Reference        |
|--------------------------------------------------|--------------------------------------------------|------------------------------------------------------|-----------------------|------------------------------------------------------|------------------|
| <i>MCS-PANi</i>                                  | <i>Electrodeposition (Reverse Voltage Pulse)</i> | <i>ZnSO<sub>4</sub> 1M and MnSO<sub>4</sub> 0.1M</i> | <i>-1 to 0.9</i>      | <i>1048.8 F/g (at CV scan rate of 5 mV/s)</i>        | <i>This work</i> |
| MnCoS                                            | CVD                                              | 6M KOH                                               | -0.2 to 0.6           | 1938 F/g (at 5 A/g)                                  | [S1]             |
| MnCoS                                            | Hydrothermal                                     | 3M NaOH                                              | 0 to 0.4              | 992 F/g (at 1 A/g)                                   | [S2]             |
| Ni-Co-Zn-S                                       | Hydrothermal                                     | 3.5M KOH                                             | 0 to 0.5              | 825 F/g (at 1 A/g)                                   | [S3]             |
| Zn-Ni-Co-S-rGO                                   | Electrodeposition (CV)                           | 2M KOH                                               | 0 to 0.6              | 1302 F/g (at 0.5 A/g)                                | [S4]             |
| FeCoS-rGO-PPy                                    | Electrodeposition (Const V)                      | 3M KOH                                               | -0.1 to 0.55          | 3178 F/g (at 2 A/g)                                  | [S5]             |
| NiCo <sub>2</sub> S <sub>4</sub> – C quantum dot | Hydrothermal                                     | 2M KOH                                               | 0 to 0.5              | 124.4 mAh/g (at 2 A/g)                               | [S6]             |
| Zn-Co-S                                          | Hydrothermal                                     | 6M KOH                                               | -0.5 to 0.4           | 578.6 F/g (at 1 A/g)                                 | [S7]             |
| FeS <sub>x</sub>                                 | Hydrothermal                                     | 1M Na <sub>2</sub> SO <sub>4</sub>                   | -0.95 to 0            | 730.52 mF/cm <sup>2</sup> (at 1 mA/cm <sup>2</sup> ) | [S8]             |
| MnCo <sub>2</sub> S <sub>4</sub>                 | Hydrothermal                                     | 1M KOH                                               | 0 to 1 V              | 1980 F/g (at 1 A/g)                                  | [S9]             |
| MnCo <sub>2</sub> S <sub>4</sub>                 | Solvothermal                                     | 3 M KOH                                              | 0 to 0.4              | 780.8 mF/cm <sup>2</sup> (at 1 mA/cm <sup>2</sup> )  | [S10]            |

**Table S2.** Electrochemical performance of various electrodes for ZHSCs

| Cathode                        | Anode                                    | Electrolyte                                            | Working Potential (V) | Capacitance                                   | Energy density                                   | Durability, stability                     | Ref              |
|--------------------------------|------------------------------------------|--------------------------------------------------------|-----------------------|-----------------------------------------------|--------------------------------------------------|-------------------------------------------|------------------|
| <i>MCS-PANi/graphite paper</i> | <i>hierarchical micro-flower-like Zn</i> | <i>ZnSO<sub>4</sub> 1M and MnSO<sub>4</sub> 0.1M</i>   | <i>0 to 2</i>         | <i>1048.8 F/g (at CV scan rate of 5 mV/s)</i> | <i>216 Wh/kg at a power density of 4610 W/kg</i> | <i>98,3 % after 11232 cycles (50 A/g)</i> | <i>This work</i> |
| Flower-like carbon             | Zn foam                                  | ZnSO <sub>4</sub> (aq)                                 | 0.1–1.8               | 132 mAh/g (1 A/g)                             | 117.5 Wh/kg                                      | 90% after 10,000 cycles (5 A/g)           | [S11]            |
| Carbon sponge                  | nano Zn foil                             | Zn(CF <sub>3</sub> SO <sub>3</sub> ) <sub>2</sub> + AN | 0–1.8                 | 226 F/g (0.1 A/g)                             | 91.5 Wh/kg                                       | Nearly 100% after 60,000 cycles (10 A/g)  | [S12]            |
| S-doped 3D PC                  | Zn foil                                  | ZnSO <sub>4</sub> (aq)                                 | 0.2–1.8               | 123.8 mAh/cm <sup>3</sup> (0.2 A/g)           | 162.6 Wh/kg                                      | 96.8% after 18,000 cycles (10 A/g)        | [S13]            |
| P-doped PC                     | Zn foil                                  | ZnSO <sub>4</sub> (aq)                                 | 0.1–1.8               | 143.7 mAh/g (1 A/g)                           | 129.3 Wh/kg                                      | 92% after 10,000 cycles (5 A/g)           | [S14]            |
| Graphene Hydrogel (GH)         | Zn foil                                  | ZnSO <sub>4</sub> (aq)                                 | 0.2–1.8               | 99.3 mAh/g (0.2 A/g)                          | 76.2 Wh/kg                                       | 90% after 10,000 cycles (15 A/g)          | [S15]            |
| 3D Mxene-rGO aerogel           | Zn foil                                  | ZnSO <sub>4</sub> (aq)                                 | 0.2–1.6               | 128.6 F/g (0.4 A/g)                           | 34.9 Wh/kg                                       | 95% after 75,000 cycles (5 A/g)           | [S16]            |
| 2D/2D LDH/V2CTx MXene          | Zn plate                                 | ZnSO <sub>4</sub> + MnSO <sub>4</sub> (aq)             | 0.9–1.85              | 372.9 mAh/g (0.2 A/g)                         | 368.7 Wh/kg                                      | 95.7% after 600 cycles (1 A/g)            | [S17]            |

|                       |            |                                                                |         |                                                    |                          |                                                      |       |
|-----------------------|------------|----------------------------------------------------------------|---------|----------------------------------------------------|--------------------------|------------------------------------------------------|-------|
| 3D graphene@PANI      | Zn foil    | ZnSO <sub>4</sub> (aq)                                         | 0.4–1.6 | 154 mAh/g (0.1 A/g)                                | 205 Wh/kg                | 80.5% after 6000 cycles (0.1 A/g)                    | [S18] |
| Few-layer phosphorene | Zn plate   | Zn(CF <sub>3</sub> SO <sub>3</sub> ) <sub>2</sub> + LiTFSI-PAM | 0.8–2.2 | 304 F/g (0.2 A/g)                                  | 315.6 Wh/kg              | Nearly 100% after 5000 cycles (0.5 A/g)              | [S19] |
| Few-layer siloxene    | Zinc plate | Zn(CF <sub>3</sub> SO <sub>3</sub> ) <sub>2</sub> + LiTFSI     | 0–1.8   | 6.86 mF/cm <sup>2</sup> (0.05 mA/cm <sup>2</sup> ) | 10.66 mJ/cm <sup>2</sup> | 94.3% after 16,000 cycles (0.05 mA/cm <sup>2</sup> ) | [S20] |

## Supplementary References

- [S1] M. Yu, X. Li, Y. Ma, R. Liu, and J. Liu, Nanohoneycomb-like manganese cobalt sulfide/three dimensional graphene-nickel foam hybrid electrodes for high-rate capability supercapacitors. *Appl. Surf. Sci.* 396, (2017) 1816.
- [S2] Y. Zhao, Z. Shi, H. Li, and C.-A. Wang, Designing pinecone-like and hierarchical manganese cobalt sulfides for advanced supercapacitor electrodes. *J. Mater. Chem. A* 6, (2018) 12782–12793.
- [S3] V. Vignesh and R. Navamathavan, Spherical-Like Ball-by-Ball Architecture of Ni-Co-Zn-S Electrodes for Electrochemical Energy Storage Application in Supercapacitors, *J. Electrochem. Soc.* 164, (2017) 434.
- [S4] U. Evariste, G. Jiang, B. Yu, Y. Liu, Z. Huang, Q. Lu, and P. Ma, 34, 2445 (2019).
- [S5] A. Karimi, I. Kazeminezhad, L. Naderi, and S. Shahrokhian, Construction of a ternary nanocomposite, polypyrrole/Fe-Co sulfide-reduced graphene oxide/nickel foam, as a novel binderfree electrode for high-performance asymmetric supercapacitors. *J. Phys. Chem. C* 124, (2020) 4393.
- [S6] Y. Zhu, J. Li, X. Yun, G. Zhao, and P. Ge, Graphitic carbon quantum dots modified nickel cobalt sulfide as cathode materials for alkaline aqueous batteries. *Nano-Micro Lett.* 12, (2020) 18.
- [S7] X. Yu, W. Zhang, L. Liu, and Y. Fautrelle, High magnetic fieldengineered bunched Zn-Co-S yolk-shell balls intercalated within S, N Codoped CNTs/graphene films for free-standing supercapacitors. *ACS Appl. Mater. Interf.* 1, (2020) 12.
- [S8] K.K. Upadhyay, T. Nguyen, T.M. Silva, M.J. Carmezim, M.F. Montemor, Pseudocapacitive behaviour of FeS<sub>x</sub> grown on stainless steel up to 1.8 V in aqueous electrolyte, *J. Energy Storage* 26 (2019) 100949.
- [S9] P.M. Anjana, S.R. Sarath Kumar, R.B. Rakhi, MnCo<sub>2</sub>S<sub>4</sub> nanoflowers directly grown over nickel foam as cathode for high-performance asymmetric hybrid supercapacitors, *Journal of Energy Storage*, 61 (2023) 106672.
- [S10] M. Fu, Q. Zhuang, H. Yu, W. Chen, MnCo<sub>2</sub>S<sub>4</sub> nanosheet arrays modified with vermicular polypyrrole for advanced free-standing flexible electrodes, *Electrochimica Acta*, 447 (2023) 142167.

- [S11] H.L. Fan, S.X. Zhou, Q.Y. Li, G.M. Gao, Y.R. Wang, F. He, G.Z. Hu, X. Hu, Hydrogen-bonded frameworks crystals-assisted synthesis of flower-like carbon materials with penetrable meso/macropores from heavy fraction of bio-oil for Zn-ion hybrid supercapacitors, *J. ColloidInterface Sci.* 600 (2021) 681–690.
- [S12] H. Zhou, C. Liu, J.C. Wu, M. Liu, D. Zhang, H. Song, X. Zhang, H. Gao, J. Yang, D. Chen, Boosting the electrochemical performance through proton transfer for the Zn-ion hybrid supercapacitor with both ionic liquid and organic electrolytes, *J. Mater. Chem. A* 7 (2019) 9708–9715.
- [S13] D. Wang, S. Wang, Z. Lu, S-doped 3D porous carbons derived from potassium thioacetate activation strategy for zinc-ion hybrid supercapacitor applications, *Int. J. Energy Res.* 45 (2021) 2498–2510.
- [S14] H.L. Fan, S.X. Zhou, Q.F. Chen, G.M. Gao, Q.F. Ban, Z.X. Xu, F. He, G.Z. Hu, X. Hu, Phosphorus in honeycomb-like carbon as a cathode boosting pseudocapacitive properties for Zn-ion storage, *J. Power Sources* 493 (2021) 229687.
- [S15] Y. Zhu, X. Ye, H. Jiang, J. Xia, Z. Yue, L. Wang, Z. Wan, C. Jia, X. Yao, Controlled swelling of graphene films towards hierarchical structures for supercapacitor electrodes, *J. Power Sources* 453 (2020) 227851.
- [S16] Q. Wang, S. Wang, X. Guo, L. Ruan, N. Wei, Y. Ma, J. Li, M. Wang, W. Li, W. Zeng, MXene-reduced graphene oxide aerogel for aqueous zinc-ion hybrid supercapacitor with ultralong cycle life, *Adv. Electron. Mater.* 5 (2019) 1900537.
- [S17] Y. Zhang, J. Cao, J. Li, Z. Yuan, D. Li, L. Wang, W. Han, Self-assembled cobaltdoped NiMn-layered double hydroxide (LDH)/V<sub>2</sub>CTx MXene hybrids for advanced queous electrochemical energy storage properties, *Chem. Eng. J.* 430 (2022) 132992.
- [S18] J.W. Han, K. Wang, W.H. Liu, C. Li, X.Z. Sun, X. Zhang, Y.B. An, S. Yi, Y.W. Ma, Rational design of nano-architecture composite hydrogel electrode towards high performance Zn-ion hybrid cell, *Nanoscale* 10 (2018) 13083–13091.
- [S19] Z. Huang, A. Chen, F. Mo, G. Liang, X. Li, Q. Yang, Y. Guo, Z. Chen, Q. Li, B. Dong, C. Zhi, Phosphorene as cathode material for high-voltage, anti-self-discharge zinc ion hybrid capacitors, *Adv. Energy Mater.* 10 (2020) 2001024.
- [S20] Q. Guo, Y. Han, N. Chen, L. Qu, Few-layer siloxene as an electrode for superior high-rate zinc ion hybrid capacitors, *ACS Energy Lett.* 6 (2021) 1786–1794.
